# Supplementary material for: Drinking habits and executive functioning: a propensity score-weighted analysis of 78,832 adults
Source: bioRxiv or medRxiv preprint supplement (doi:10.1101/2020.12.22.20248655), 2020-12-22
Supplement: Supplementary file [file media-1.pdf]

**Supplemental material belonging to:**

Drinking habits and executive functioning: a propensity score-weighted analysis of 78,832 adults

*Schweren, Haavik, Li, Solberg, Larsson & Hartman. 2020*

Contents:

1. Participant flowchart
2. Heatmap: propensity scores vs. all potential confounders
3. Balance before and after propensity score weighing
  - i. Means by drinking level before and after weighing
  - ii. Means by binge-drinking (yes/no) before and after weighing
  - iii. Adjustable and non-adjustable differences between weighted groups
4. Results among participants of white ethnicity only
5. Results stratified by age and sex
6. Results stratified by drink type

## Supplement 1: Participant flowchart

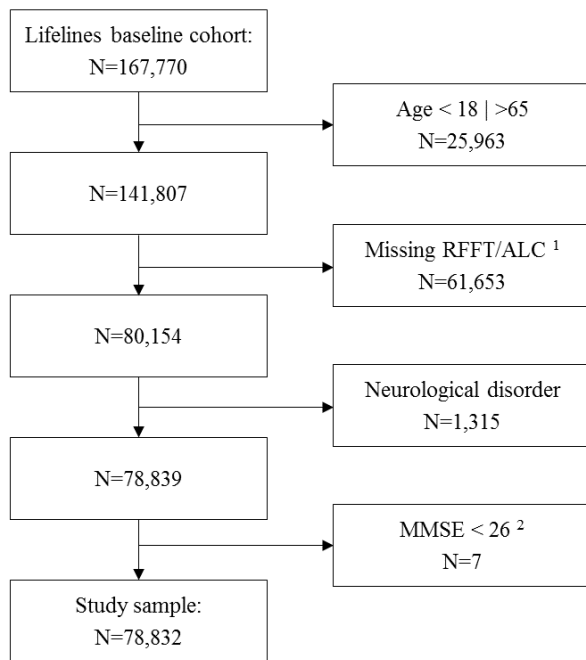

**Supplemental Figure S1.** Participant flowchart.

RFFT = Ruff Figural Fluency Task; MMSE = Mini Mental State Examination; <sup>1</sup> For logistical reasons, the RFFT was administered in all Lifelines participants until April 2012, and in a random half of all participants thereafter, resulting in a relatively large proportion of missing data; <sup>2</sup> By protocol, the RFFT was not administered in participants with MMSE<26. Moreover, MMSE was only administered in participants age 65 and older. Thus, the vast majority of participants with MMSE<26 were already excluded in a previous step.

## Supplement 2: Correlations between propensity scores and all potential confounders

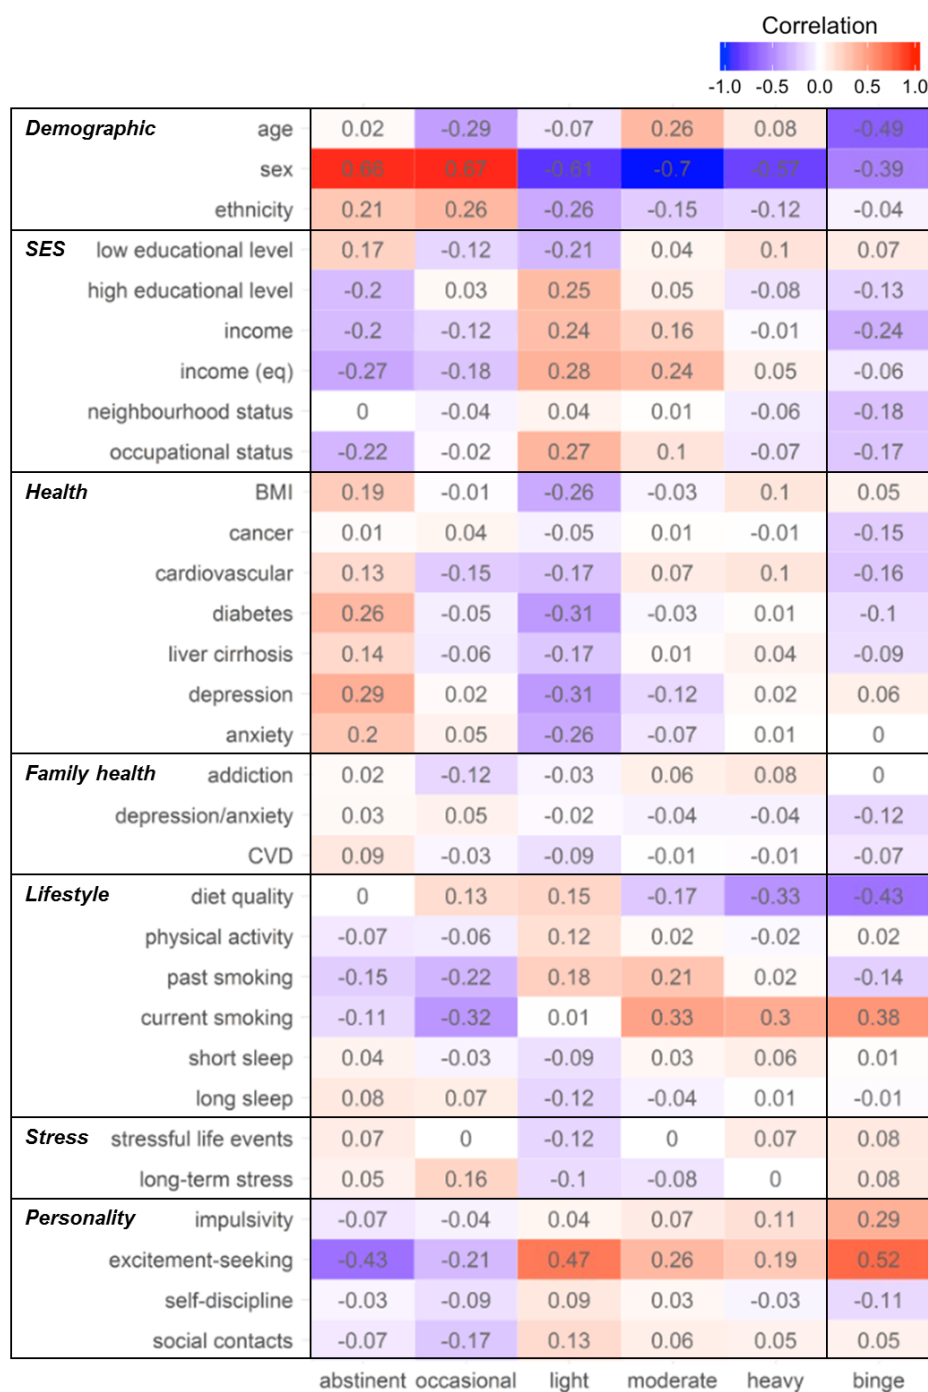

Supplemental Figure S2. Heatmap of correlations between all confounders and each propensity score.

### Supplement 3: Balance before and after weighing

Supplemental Table S3.1. Means by drinking level before and after weighing

|                        | Before weighing |        |        |        |        | After weighing |        |        |        |         |
|------------------------|-----------------|--------|--------|--------|--------|----------------|--------|--------|--------|---------|
|                        | abst.           | occ.   | light  | mod.   | heavy  | abst.          | occ.   | light  | mod.   | heavy   |
| Age                    | 42.9            | 41.7   | 42.6   | 45.1   | 44.4   | 43.2           | 42.8   | 42.9   | 43.5   | 44.4*   |
| Income                 | 2309.8          | 2407.9 | 2498.1 | 2543.6 | 2415.4 | 2432.6         | 2442.1 | 2448.2 | 2469.6 | 2505.2  |
| Income equivalised     | 1483.3          | 1561.1 | 1636.1 | 1694.3 | 1643.2 | 1586.7         | 1589.1 | 1598.5 | 1618.0 | 1665.4* |
| Neighbourhood status   | -0.6            | -0.6   | -0.6   | -0.6   | -0.7   | -0.6           | -0.6   | -0.6   | -0.6   | -0.6    |
| Occupational status    | 42.4            | 46.0   | 47.8   | 47.8   | 43.5   | 46.0           | 46.1   | 46.3   | 46.7   | 46.4    |
| BMI                    | 26.7            | 26.0   | 25.7   | 25.9   | 26.8   | 26.1           | 26.0   | 26.0   | 25.9   | 26.1    |
| Diet quality           | 23.7            | 23.9   | 23.9   | 23.0   | 20.4   | 23.7           | 23.7   | 23.7   | 23.6   | 23.1*   |
| Physical activity      | 249.3           | 259.1  | 275.0  | 270.2  | 254.9  | 259.1          | 260.9  | 264.3  | 257.4  | 259.8   |
| SLE                    | 1.3             | 1.2    | 1.1    | 1.2    | 1.4    | 1.2            | 1.2    | 1.2    | 1.2    | 1.2     |
| LTD                    | 2.7             | 2.7    | 2.5    | 2.4    | 2.6    | 2.6            | 2.6    | 2.6    | 2.6    | 2.5     |
| Impulsivity            | 22.1            | 22.3   | 22.4   | 22.6   | 23.2   | 22.3           | 22.3   | 22.4   | 22.4   | 22.6    |
| Excitement seeking     | 20.5            | 21.8   | 22.9   | 23.2   | 23.9   | 22.0           | 22.1   | 22.3   | 22.3   | 22.6*   |
| Self-discipline        | 29.2            | 29.1   | 29.4   | 29.4   | 29.0   | 29.3           | 29.3   | 29.3   | 29.3   | 29.5    |
| Social contacts        | 16.7            | 16.7   | 18.1   | 18.2   | 18.7   | 17.3           | 17.4   | 17.5   | 17.3   | 17.9    |
| Male sex(%)            | 19.4            | 31.8   | 48.3   | 63.5   | 82.2   | 41.6           | 40.0   | 42.1   | 45.4   | 51.3*   |
| Nonwhite ethnicity (%) | 2.1             | 1.8    | 1.1    | 0.9    | 0.5    | 1.6            | 1.5    | 1.4    | 1.1    | 1.1     |
| Low education (%)      | 34.9            | 26.6   | 25.6   | 29.7   | 37.5   | 29.3           | 28.6   | 28.4   | 28.8   | 29.6    |
| High education (%)     | 22.7            | 30.7   | 22.8   | 32.5   | 23.2   | 28.9           | 30.2   | 30.6   | 31.2   | 30.2    |
| Cancer (%)             | 3.7             | 3.8    | 3.6    | 3.7    | 3.5    | 3.7            | 3.8    | 3.8    | 3.5    | 4.7     |
| CVD (%)                | 34.3            | 28.5   | 28.6   | 32.4   | 37.1   | 31.2           | 30.3   | 30.3   | 30.6   | 33.3    |
| Diabetes (%)           | 2.9             | 1.8    | 1.4    | 1.7    | 1.8    | 2.1            | 1.9    | 1.8    | 2.2    | 1.6     |
| Liver cirrhosis (%)    | 2.5             | 1.8    | 1.7    | 1.9    | 2.2    | 2.0            | 1.9    | 1.8    | 1.9    | 1.3     |
| Depression (%)         | 5.0             | 3.2    | 2.5    | 2.5    | 3.3    | 3.3            | 3.1    | 3.1    | 3.1    | 2.9     |
| Anxiety (%)            | 10.7            | 8.3    | 6.9    | 7.3    | 8.1    | 8.2            | 8.1    | 7.9    | 8.7    | 7.7     |
| Fam addiction (%)      | 5.6             | 4.9    | 5.3    | 6.0    | 7.3    | 5.8            | 5.3    | 5.4    | 5.7    | 5.6     |
| Fam dep/anx (%)        | 27.0            | 26.8   | 26.1   | 25.0   | 24.1   | 26.2           | 26.4   | 26.1   | 25.7   | 26.7    |
| Fam CVD (%)            | 10.7            | 9.4    | 8.9    | 9.2    | 8.9    | 9.9            | 9.5    | 9.4    | 8.9    | 9.7     |

|                     |      |      |      |      |      |      |      |      |      |       |
|---------------------|------|------|------|------|------|------|------|------|------|-------|
| Past smoking (%)    | 25.8 | 28.1 | 34.3 | 40.0 | 34.5 | 30.9 | 31.8 | 32.1 | 33.8 | 36.0* |
| Current smoking (%) | 17.7 | 17.1 | 22.1 | 33.3 | 44.9 | 20.4 | 21.3 | 22.4 | 23.4 | 27.2* |
| Short sleep (%)     | 11.0 | 9.7  | 9.2  | 10.9 | 13.7 | 10.3 | 10.1 | 10.1 | 10.7 | 10.0  |
| Long sleep (%)      | 12.0 | 10.8 | 8.8  | 8.8  | 10.4 | 10.2 | 10.1 | 9.7  | 9.3  | 9.6   |

\* adjustable difference between indicated group and abstinent group after weighing. Abbreviations: abst. = abstinent, occ. = occasional drinker, mod. = moderate drinker.

**Supplemental Table S3.2.** Means by binge-drinking (yes/no) before and after weighing

|                        | Before weighing    |                | After weighing     |                |
|------------------------|--------------------|----------------|--------------------|----------------|
|                        | non-binge-drinking | binge-drinking | non-binge-drinking | binge-drinking |
| Age                    | 43.5               | 36.8           | 42.8               | 42.6           |
| Income                 | 2466.3             | 2224.1         | 2442.9             | 2444.1         |
| Income equivalised     | 1597.5             | 1557.0         | 1593.6             | 1608.2         |
| Neighbourhood status   | -0.6               | -0.8           | -0.6               | -0.6           |
| Occupational status    | 46.6               | 42.2           | 46.2               | 45.5           |
| BMI                    | 26.0               | 26.2           | 26.0               | 26.1           |
| Diet quality           | 24.0               | 21.0           | 23.7               | 23.4           |
| Physical activity      | 264.2              | 270.6          | 264.6              | 267.4          |
| SLE                    | 1.2                | 1.3            | 1.2                | 1.2            |
| LTD                    | 2.6                | 2.8            | 2.6                | 2.6            |
| Impulsivity            | 22.2               | 23.6           | 22.4               | 22.5           |
| Excitement seeking     | 21.9               | 24.9           | 22.2               | 22.5           |
| Self-discipline        | 29.3               | 28.7           | 29.3               | 29.4           |
| Social contacts        | 17.4               | 18.3           | 17.5               | 17.2           |
| Male sex(%)            | 39.0               | 57.4           | 40.8               | 43.3           |
| Nonwhite ethnicity (%) | 1.5                | 1.2            | 1.5                | 1.4            |
| Low education (%)      | 28.2               | 32.4           | 28.6               | 29.3           |
| High education (%)     | 31.1               | 23.2           | 30.3               | 28.1           |
| Cancer (%)             | 3.8                | 2.5            | 3.7                | 3.8            |
| CVD (%)                | 31.2               | 23.9           | 30.5               | 30.3           |
| Diabetes (%)           | 1.9                | 1.3            | 1.9                | 1.7            |
| Liver cirrhosis (%)    | 2.0                | 1.4            | 1.9                | 1.6            |
| Depression (%)         | 3.1                | 3.7            | 3.2                | 3.1            |

|                     |      |      |      |      |
|---------------------|------|------|------|------|
| Anxiety (%)         | 8.1  | 7.9  | 8.1  | 8.3  |
| Fam addiction (%)   | 5.4  | 5.5  | 5.4  | 5.7  |
| Fam dep/anx (%)     | 26.8 | 21.8 | 26.3 | 26.0 |
| Fam CVD (%)         | 9.6  | 8.0  | 9.5  | 9.0  |
| Past smoking (%)    | 32.6 | 24.4 | 31.8 | 33.9 |
| Current smoking (%) | 19.8 | 39.2 | 21.8 | 23.9 |
| Short sleep (%)     | 10.0 | 10.3 | 10.0 | 9.6  |
| Long sleep (%)      | 10.0 | 9.5  | 10.0 | 9.9  |

**Supplemental Table S3.3.** Adjustable and non-adjustable differences between weighted groups

|                | Contrast               | Confounder         | Group 1 | Group 2 | ASMD   |
|----------------|------------------------|--------------------|---------|---------|--------|
| Adjustable     | Abstinent vs. moderate | Smoking: never     | 48.7%   | 42.8%   | 0.1185 |
|                | Abstinent vs. heavy    | Age                | 43.2    | 44.4    | 0.1103 |
|                | Abstinent vs. heavy    | Sex: male          | 41.6%   | 51.3%   | 0.1946 |
|                | Abstinent vs. heavy    | Income equivalised | 1586.7  | 1665.4  | 0.1553 |
|                | Abstinent vs. heavy    | Diet quality       | 23.7    | 23.1    | 0.1148 |
|                | Abstinent vs. heavy    | Smoking: never     | 48.7%   | 36.8%   | 0.2385 |
|                | Abstinent vs. heavy    | Smoking: past      | 30.9%   | 36.0%   | 0.1066 |
|                | Abstinent vs. heavy    | Smoking: current   | 20.4%   | 27.2%   | 0.1614 |
|                | Abstinent vs. heavy    | Excitement-seeking | 22.0    | 22.6    | 0.1404 |
| Non-adjustable | <i>None</i>            |                    |         |         |        |

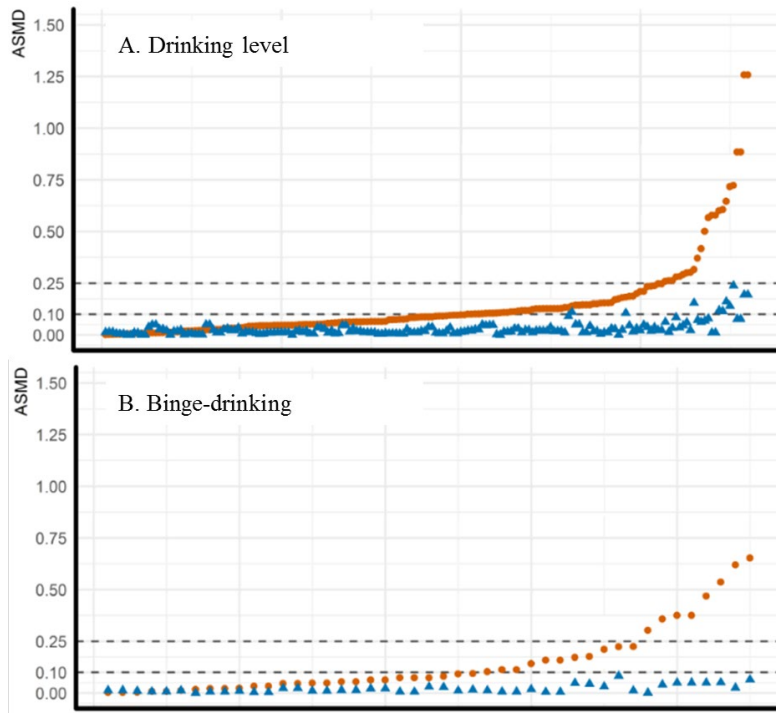

**Supplemental Figure S3.4.** Absolute standardised mean differences (ASMD) in pairwise between-group contrasts (e.g.  $ASMD_{AGE}$  abstinent vs. light drinkers,  $ASMD_{AGE}$  abstinent vs. moderate drinkers, etc.) before (red circle) and after (blue triangle) propensity score weighing. On the X-axis, contrasts are ordered by their pre-weighting ASMD. Dashed horizontal lines indicate acceptable ( $ASMD < 0.1$ ) and adjustable ( $ASMD < 0.25$ ) residual imbalance after weighing. No residual between-group difference exceeds  $ASMD = 0.25$ .

## Supplement 4: Results among participants of white ethnicity only

**Supplemental Table S4.1.** Adjustable and non-adjustable differences between weighted groups

|                | Contrast               | Confounder         | Group 1 | Group 2 | ASMD   |
|----------------|------------------------|--------------------|---------|---------|--------|
| Adjustable     | Abstinent vs. moderate | Smoking: never     | 48.4%   | 43.3%   | 0.1016 |
|                | Abstinent vs. heavy    | Diet quality       | 23.7    | 23.0    | 0.1320 |
|                | Abstinent vs. heavy    | Smoking: never     | 48.4%   | 40.9%   | 0.1502 |
|                | Abstinent vs. heavy    | Smoking: current   | 20.6%   | 25.5%   | 0.1165 |
|                | Abstinent vs. heavy    | Excitement-seeking | 21.9    | 22.7    | 0.1549 |
| Non-adjustable | <i>None</i>            |                    |         |         |        |

**Supplemental Table S4.2.** Propensity weighted models comparing abstinent participants to each drinking level, and binge-drinkers to non-binge-drinkers

|                                        | Non-standardised |                | Standardised |                | p       |
|----------------------------------------|------------------|----------------|--------------|----------------|---------|
|                                        | Est              | 95% CI         | $\beta$      | 95% CI         |         |
| Occasional (0-2.5 g/day) vs. abstinent | 0.343            | -0.179 – 0.864 | 0.015        | -0.008 – 0.038 | 0.1974  |
| Light (2.5-14.9 g/day) vs. abstinent   | 0.849            | 0.389 – 1.318  | 0.038        | 0.017 – 0.058  | 0.0004  |
| Moderate (15-29.9 g/day) vs. abstinent | 1.793            | 1.122 – 2.465  | 0.079        | 0.050 – 0.109  | <0.0001 |
| Heavy (30-60 g/day) vs. abstinent      | 0.789            | -0.977 – 2.736 | 0.039        | -0.043 – 0.121 | 0.3531  |
| Binge-drinking yes vs no               | 0.233            | -0.528 – 0.994 | 0.010        | -0.023 – 0.044 | 0.5479  |



## Supplement 5: Results stratified by age and sex

**Supplemental Table S5.1.** Age- and sex-stratified groups

| Sex    | Age            | N      | %    |
|--------|----------------|--------|------|
| Male   | Young (18-38)  | 10,392 | 13.2 |
|        | Middle (39-48) | 11,999 | 15.2 |
|        | Old (49-65)    | 9,876  | 12.5 |
| Female | Young (18-38)  | 15,442 | 19.6 |
|        | Middle (39-48) | 17,287 | 21.9 |
|        | Old (49-65)    | 13,836 | 17.6 |

**Supplemental Table S5.2.** Adjustable and non-adjustable differences between weighted groups

|            | Group         | Contrast           | Confounder             | Group 1            | Group 2 | ASMD   |        |
|------------|---------------|--------------------|------------------------|--------------------|---------|--------|--------|
| Adjustable | Male – young  | Abst. vs. light    | Excitement-seeking     | 25.1               | 25.6    | 0.1217 |        |
|            |               | Abst. vs. moderate | Smoking: never         | 55.3%              | 48.4%   | 0.1377 |        |
|            |               | Abst. vs. moderate | Excitement-seeking     | 25.1               | 25.7    | 0.1582 |        |
|            |               | Abst. vs. heavy    | Ethnicity: white       | 98.4%              | 99.7%   | 0.1267 |        |
|            | Male – middle | Abst. vs. heavy    | Ethnicity: white       | 98.7%              | 99.9%   | 0.1114 |        |
|            |               | Abst. vs. heavy    | Excitement-seeking     | 23.2               | 23.7    | 0.1172 |        |
|            | Male – old    | Abst. vs. moderate | Excitement-seeking     | 21.5               | 21.9    | 0.1003 |        |
|            |               | Abst. vs. heavy    | Ethnicity: white       | 98.6%              | 99.8%   | 0.1252 |        |
|            |               | Abst. vs. heavy    | Family: addiction      | 5.3%               | 3.1%    | 0.1029 |        |
|            |               | Abst. vs. heavy    | Excitement-seeking     | 21.5               | 22.2    | 0.1688 |        |
|            |               | Female – young     | Abst. vs. light        | Excitement-seeking | 22.9    | 23.3   | 0.1019 |
|            |               | Abst. vs. moderate | Education: middle      | 49.1%              | 43.7%   | 0.1085 |        |
|            |               | Abst. vs. moderate | Education: high        | 36.1%              | 43.7%   | 0.1532 |        |
|            |               | Abst. vs. moderate | BMI                    | 25.1               | 24.5    | 0.1281 |        |
|            |               | Abst. vs. moderate | Family: cardiovascular | 7.3%               | 2.9%    | 0.1832 |        |
|            |               | Abst. vs. moderate | Smoking: never         | 60.2%              | 52.3%   | 0.1575 |        |
|            |               | Abst. vs. moderate | Smoking: current       | 21.1%              | 26.2%   | 0.1164 |        |
|            |               | Abst. vs. moderate | Excitement-seeking     | 22.9               | 23.7    | 0.1782 |        |

|                |                 |                     |                      |        |        |        |
|----------------|-----------------|---------------------|----------------------|--------|--------|--------|
|                |                 | Abst. vs. heavy     | Sleep: short         | 7.3%   | 2.4%   | 0.1904 |
|                |                 | Abst. vs. heavy     | Sleep: long          | 12.7%  | 5.2%   | 0.2331 |
|                |                 | Binge vs. non-binge | Age                  | 29.6   | 30.2   | 0.1032 |
|                |                 | Binge vs. non-binge | Smoking: never       | 52.2%  | 57.2%  | 0.1017 |
|                |                 | Binge vs. non-binge | Excitement-seeking   | 23.7   | 23.2   | 0.1302 |
|                | Female – middle | Abst. vs. moderate  | Income               | 2500.8 | 2578.1 | 0.1008 |
|                |                 | Abst. vs. moderate  | Income (equivalised) | 1490.7 | 1552.2 | 0.1325 |
|                |                 | Abst. vs. moderate  | Smoking: never       | 50.7%  | 44.9%  | 0.1166 |
|                |                 | Abst. vs. moderate  | Sleep: long          | 9.9%   | 6.6%   | 0.1156 |
|                |                 | Abst. vs. heavy     | Ethnicity: white     | 98.5%  | 100.0% | 0.1276 |
|                |                 | Binge vs. non-binge | Impulsivity          | 22.9   | 22.5   | 0.1002 |
|                | Female – old    | Abst. vs. moderate  | Income (equivalised) | 1651.2 | 1705.4 | 0.1055 |
|                |                 | Abst. vs. moderate  | Smoking: never       | 37.2%  | 31.8%  | 0.1163 |
|                |                 | Abst. vs. heavy     | Ethnicity: white     | 99.0%  | 100.0% | 0.1076 |
|                |                 | Abst. vs. heavy     | Income               | 2372.1 | 2525.2 | 0.1990 |
|                |                 | Abst. vs. heavy     | Income (equivalised) | 1651.2 | 1772.0 | 0.2350 |
|                |                 | Abst. vs. heavy     | Diabetes             | 3.8%   | 0.3%   | 0.2096 |
|                |                 | Abst. vs. heavy     | Smoking: past        | 46.4%  | 57.8%  | 0.2281 |
|                |                 | Abst. vs. heavy     | Smoking: current     | 16.4%  | 23.1%  | 0.1787 |
|                |                 | Binge vs. non-binge | Excitement-seeking   | 20.0   | 19.5   | 0.1426 |
| Non-adjustable | Female – young  | Abst. vs. heavy     | Income               | 2254.0 | 1777.0 | 0.5428 |
|                |                 | Abst. vs. heavy     | Income (equivalised) | 1514.8 | 1372.2 | 0.2681 |
|                |                 | Abst. vs. heavy     | Family: dep/anx      | 28.5%  | 10.0%  | 0.4118 |
|                |                 | Abst. vs. heavy     | Sleep: normal        | 80.0%  | 92.4%  | 0.3169 |
|                | Female – middle | Abst. vs. heavy     | Income (equivalised) | 1490.7 | 1609.7 | 0.2568 |
|                |                 | Abst. vs. heavy     | Cancer               | 3.8%   | 12.1%  | 0.4224 |
|                | Female – old    | Abst. vs. heavy     | Smoking: never       | 37.2%  | 19.1%  | 0.3875 |

Abbreviations: abst. = abstinent

**Supplemental Table S5.3.** Fully adjusted models comparing abstinent participants to each drinking level, and binge-drinkers to non-binge-drinkers, in age- and sex stratified groups

|                                        |                   | N      | $\beta$ | 95% CI          | p       |
|----------------------------------------|-------------------|--------|---------|-----------------|---------|
| Occasional (0-2.5 g/day) vs. abstinent | Full sample       | 16,838 | 0.018   | -0.006 – 0.043  | 0.1432  |
|                                        | Male – young      | 1,710  | -0.018  | -0.109 – 0.074  | 0.7084  |
|                                        | Male – middle     | 2,181  | 0.044   | -0.031 – 0.119  | 0.2494  |
|                                        | Male – old        | 1,456  | -0.026  | -0.109 – 0.056  | 0.5329  |
|                                        | Female – young    | 4,487  | 0.024   | -0.022 – 0.069  | 0.3053  |
|                                        | Female – middle   | 4,142  | 0.045   | 0.004 – 0.086   | 0.0312  |
|                                        | Female – old      | 2,862  | 0.069   | 0.020 – 0.117   | 0.0056  |
| Light (2.5-14.9 g/day) vs. abstinent   | Full sample       | 33,827 | 0.056   | 0.033 – 0.078   | <0.0001 |
|                                        | Male – young      | 5,605  | -0.002  | -0.085 – 0.080  | 0.9541  |
|                                        | Male – middle     | 5,916  | 0.093   | 0.026 – 0.160   | 0.0065  |
|                                        | Male – old        | 4,821  | 0.005   | -0.067 – 0.077  | 0.8912  |
|                                        | Female – young    | 5,862  | 0.059   | 0.014 – 0.104   | 0.0104  |
|                                        | Female – middle   | 6,095  | 0.108   | 0.069 – 0.147   | <0.0001 |
|                                        | Female – old      | 5,528  | 0.106   | 0.064 – 0.149   | <0.0001 |
| Moderate (15-29.9 g/day) vs. abstinent | Full sample       | 8,955  | 0.111   | 0.079 – 0.143   | <0.0001 |
|                                        | Male – young      | 1,695  | 0.033   | -0.061 – 0.127  | 0.4893  |
|                                        | Male – middle     | 1,966  | 0.174   | 0.098 – 0.250   | <0.0001 |
|                                        | Male – old        | 2,030  | 0.052   | -0.026 – 0.131  | 0.1917  |
|                                        | Female – young    | 584    | 0.131   | 0.024 – 0.238   | 0.0165  |
|                                        | Female – middle   | 1,094  | 0.145   | 0.067 – 0.224   | 0.0003  |
|                                        | Female – old      | 1,586  | 0.153   | 0.089 – 0.218   | <0.0001 |
| Heavy (30-60 g/day) vs. abstinent      | Full sample       | 1,839  | 0.075   | -0.009 – 0.158  | 0.0791  |
|                                        | Male – young      | 452    | 0.033   | -0.104 – 0.169  | 0.6389  |
|                                        | Male – middle     | 529    | 0.111   | -0.028 – 0.249  | 0.1168  |
|                                        | Male – old        | 531    | 0.054   | -0.063 – 0.171  | 0.3655  |
|                                        | Female – young *  | 40     | -0.401  | -0.740 – -0.062 | 0.0206  |
|                                        | Female – middle * | 122    | 0.021   | -0.267 – 0.309  | 0.8869  |
|                                        | Female – old *    | 165    | 0.094   | -0.065 – 0.252  | 0.2484  |
| Binge-drinking yes vs no               | Full sample       | 8,380  | 0.032   | -0.002 – 0.066  | 0.0654  |
|                                        | Male – young      | 2,426  | 0.022   | -0.029 – 0.073  | 0.3940  |

|  |                 |       |        |                |        |
|--|-----------------|-------|--------|----------------|--------|
|  | Male – middle   | 1,534 | 0.021  | -0.038 – 0.080 | 0.4816 |
|  | Male – old      | 851   | -0.071 | -0.162 – 0.020 | 0.1249 |
|  | Female – young  | 2,111 | 0.036  | -0.028 – 0.101 | 0.2713 |
|  | Female – middle | 909   | 0.134  | 0.046 – 0.222  | 0.0030 |
|  | Female – old    | 549   | 0.052  | -0.061 – 0.165 | 0.3670 |

## Supplement 6: Results stratified by drink type

**Supplemental Table S6.1.** Adjustable and non-adjustable differences between weighted groups

|                | Group | Contrast            | Confounder               | Group 1 | Group 2 | ASMD   |
|----------------|-------|---------------------|--------------------------|---------|---------|--------|
| Adjustable     | Beer  | Abst vs. occasional | Sex: male                | 41.8%   | 48.0%   | 0.1698 |
|                |       | Abst vs. occasional | Smoking: never           | 52.1%   | 46.2%   | 0.1202 |
|                |       | Abst vs. occasional | Smoking: current         | 21.6%   | 26.5%   | 0.1068 |
|                |       | Abst vs. light      | Smoking: never           | 52.1%   | 44.6%   | 0.1523 |
|                |       | Abst vs. light      | Smoking: current         | 21.6%   | 27.1%   | 0.1196 |
|                |       | Abst vs. light      | Excitement-seeking       | 21.7    | 22.6    | 0.1884 |
|                |       | Abst vs. moderate   | Diet quality             | 22.8    | 22.0    | 0.1698 |
|                |       | Abst vs. moderate   | Excitement-seeking       | 21.7    | 22.8    | 0.2304 |
|                |       | Abst vs. heavy      | Ethnicity: white         | 98.2%   | 100.0%  | 0.1755 |
|                |       | Abst vs. heavy      | Rheumatoid/liver disease | 2.2%    | 0.7%    | 0.1258 |
|                |       | Abst vs. heavy      | Diet quality             | 22.8    | 21.8    | 0.2017 |
|                |       | Binge vs. non-binge | Age                      | 40.6    | 41.8    | 0.1159 |
|                |       | Binge vs. non-binge | Sex: male                | 55.1%   | 44.4%   | 0.2149 |
|                |       | Binge vs. non-binge | Diet quality             | 22.2%   | 22.8%   | 0.1111 |
|                |       | Binge vs. non-binge | Smoking: never           | 43.1%   | 51.1%   | 0.1585 |
|                |       | Binge vs. non-binge | Excitement-seeking       | 22.7    | 21.9    | 0.1758 |
|                | Wine  | Abst vs. moderate   | Smoking: never           | 49.4%   | 43.8%   | 0.1122 |
|                |       | Abst vs. heavy      | Age                      | 43.6    | 45.9    | 0.2185 |
|                |       | Abst vs. heavy      | Sex: male                | 30.1%   | 38.6%   | 0.1819 |
|                |       | Abst vs. heavy      | Smoking: past            | 32.1%   | 39.8%   | 0.1607 |
|                |       | Abst vs. heavy      | Smoking: current         | 18.5%   | 25.7%   | 0.1795 |
| Non-adjustable | Beer  | Abst vs. light      | Sex: male                | 41.8%   | 52.7%   | 0.2991 |
|                |       | Abst vs. moderate   | Sex: male                | 41.8%   | 56.2%   | 0.3968 |
|                |       | Abst vs. moderate   | Smoking: never           | 52.1%   | 37.0%   | 0.3060 |
|                |       | Abst vs. moderate   | Smoking: current         | 21.6%   | 33.2%   | 0.2536 |
|                |       | Abst vs. heavy      | Sex: male                | 41.8%   | 59.8%   | 0.4936 |
|                |       | Abst vs. heavy      | Smoking: never           | 52.1%   | 33.6%   | 0.3749 |

|  |      |                |                    |       |       |        |
|--|------|----------------|--------------------|-------|-------|--------|
|  |      | Abst vs. heavy | Smoking: current   | 21.6% | 40.8% | 0.4197 |
|  |      | Abst vs. heavy | Excitement-seeking | 21.7  | 23.0  | 0.2792 |
|  | Wine | Abst vs. heavy | Smoking: never     | 49.4% | 34.5% | 0.3002 |

Abbreviations: abst. = abstinent

**Supplemental Table S6.2.** Fully adjusted models comparing abstinent participants to each drinking level, and binge-drinkers to non-binge-drinkers, in age- and sex stratified groups

|                                        |             | N      | $\beta$ | 95% CI         | p       |
|----------------------------------------|-------------|--------|---------|----------------|---------|
| Occasional (0-2.5 g/day) vs. abstinent | Full sample | 16,838 | 0.018   | -0.006 – 0.043 | 0.1432  |
|                                        | Beer        | 2,369  | 0.036   | -0.015 – 0.087 | 0.1632  |
|                                        | Wine        | 11,104 | 0.022   | -0.002 – 0.047 | 0.0771  |
| Light (2.5-14.9 g/day) vs. abstinent   | Full sample | 33,827 | 0.056   | 0.033 – 0.078  | <0.0001 |
|                                        | Beer *      | 5,637  | 0.037   | -0.010 – 0.085 | 0.1248  |
|                                        | Wine        | 22,399 | 0.065   | 0.043 – 0.087  | <0.0001 |
| Moderate (15-29.9 g/day) vs. abstinent | Full sample | 8,955  | 0.111   | 0.079 – 0.143  | <0.0001 |
|                                        | Beer *      | 2,194  | 0.134   | 0.061 – 0.207  | 0.0003  |
|                                        | Wine        | 5,010  | 0.119   | 0.080 – 0.157  | <0.0001 |
| Heavy (30-60 g/day) vs. abstinent      | Full sample | 1,839  | 0.075   | -0.009 – 0.158 | 0.0791  |
|                                        | Beer *      | 793    | 0.051   | -0.070 – 0.173 | 0.4062  |
|                                        | Wine *      | 626    | 0.037   | -0.074 – 0.147 | 0.5151  |
| Binge-drinking yes vs no               | Full sample | 8,380  | 0.032   | -0.002 – 0.066 | 0.0654  |
|                                        | Beer        | 3,563  | 0.027   | -0.026 – 0.080 | 0.3134  |
|                                        | Wine        | 2,958  | 0.055   | 0.001 – 0.110  | 0.0470  |

\* Residual non-adjustable imbalance (ASMD>0.25) remained after propensity score weighing, rendering this between-group comparison prone to residual confounding.
